# Supplementary material for: Probing the relationship between Gram-negative and Gram-positive S1 proteins by sequence analysis
Source: PubMed Central journal article supplement — Nucleic Acids Res. 2009 Jul 15;37(16):5578–88. doi: 10.1093/nar/gkp547 (PMC2760812; doi:10.1093/nar/gkp547), 2009-07-15
Supplement: gkp547_2.pdf [file gkp547_2.pdf]

## Gram positive bacteria with high G+C

### *Mycobacterium tuberculosis* (CAB08883)

|       | Dom1          | Dom2           | Dom3           | Dom4           | Dom45          | Dom5           | Dom6          | reference |
|-------|---------------|----------------|----------------|----------------|----------------|----------------|---------------|-----------|
| Mt_D1 | 75<br>1.8e-22 | -34<br>4.8e-3  | 17<br>2.9e-7   | 25<br>6.8e-11  | 1<br>7.0e-9    | -37<br>2.2e-4  | 20<br>1.4e-8  | ec1/hs1   |
| Mt_D2 | -13<br>5.2e-5 | 108<br>1.8e-32 | -8<br>4.1e-5   | -17<br>1.5e-6  | -21<br>9.4e-7  | -32<br>6.6e-5  | 27<br>2.5e-9  | ec2/hs2   |
| Mt_D3 | 6<br>7.3e-7   | -31<br>2.7e-3  | 146<br>1.3e-43 | 110<br>7.2e-33 | 132<br>1.1e-39 | 105<br>2.1e-31 | 41<br>2.7e-12 | S1-like   |
| Mt_D4 | -29<br>2.5e-3 | -21<br>2.7e-4  | 65<br>1.9e-19  | 115<br>1.8e-34 | 109<br>1.0e-32 | 85<br>1.8e-25  | 73<br>7.7e-22 | hs4       |
| Mt_D5 | -77<br>8.0    | -71<br>6.9     | -94<br>8.0     | -99<br>8.0     | -106<br>8.0    | -90<br>7.9     | -80<br>8.0    |           |

### *Streptomyces coelicolor* (CAB52054)

|       | Dom1          | Dom2           | Dom3           | Dom4           | Dom45          | Dom5           | Dom6          | reference |
|-------|---------------|----------------|----------------|----------------|----------------|----------------|---------------|-----------|
| Sc_D1 | 75<br>2.4e-22 | -38<br>1.2e-2  | 16<br>3.3e-7   | 11<br>2.1e-9   | -8<br>5.4e-8   | -38<br>3.0e-4  | 8<br>2.3e-7   | ec1/hs1   |
| Sc_D2 | -10<br>3.1e-5 | 109<br>1.7e-32 | -10<br>5.7e-5  | -17<br>1.3e-6  | -25<br>3.0e-6  | -48<br>2.8e-3  | 23<br>6.4e-9  | ec2/hs2   |
| Sc_D3 | -4<br>7.6e-6  | -32<br>3.0e-3  | 144<br>3.1e-43 | 100<br>9.0e-30 | 124<br>3.1e-37 | 100<br>5.3e-30 | 38<br>2.6e-11 | S1-like   |
| Sc_D4 | -24<br>8.6e-4 | -24<br>5.1e-4  | 74<br>5.1e-22  | 118<br>2.9e-35 | 116<br>1.4e-34 | 90<br>5.7e-27  | 75<br>2.2e-22 | S1-TEX    |
| Sc_D5 | -66<br>7.2    | -71<br>7.0     | -86<br>8.0     | -97<br>8.0     | -104<br>8.0    | -95<br>8.0     | -71<br>7.8    |           |

### *Micrococcus luteus* (ZP\_02944046)

|       | Dom1          | Dom2           | Dom3           | Dom4           | Dom45          | Dom5           | Dom6          | reference |
|-------|---------------|----------------|----------------|----------------|----------------|----------------|---------------|-----------|
| MI_D1 | 71<br>2.4e-21 | -36<br>7.9e-3  | 16<br>3.9e-7   | 20<br>2.1e-10  | -5<br>2.7e-8   | -39<br>3.3e-4  | 12<br>7.9e-8  | ec1/hs1   |
| MI_D2 | -10<br>3.0e-5 | 102<br>1.7e-30 | -2<br>1.3e-5   | -19<br>2.5e-6  | -25<br>2.5e-6  | -45<br>1.4e-3  | 28<br>1.9e-9  | ec2/hs2   |
| MI_D3 | 1<br>2.2e-6   | -28<br>1.4e-3  | 145<br>1.7e-43 | 108<br>3.0e-32 | 128<br>2.4e-38 | 100<br>6.7e-30 | 35<br>1.7e-10 | S1-like   |
| MI_D4 | -30<br>3.4e-3 | -37<br>8.3e-3  | 65<br>3.0e-19  | 100<br>6.2e-30 | 97<br>6.7e-29  | 74<br>6.0e-22  | 72<br>2.5e-21 | hs4       |
| MI_D5 | -73<br>8      | -63<br>2.3     | -87<br>8       | -78<br>2.6     | -88<br>4.6     | -91<br>8       | -76<br>8      |           |

### *Arthrobacter aureescens* (YP\_947812)

|       | Dom1          | Dom2           | Dom3           | Dom4           | Dom45          | Dom5          | Dom6          | reference |
|-------|---------------|----------------|----------------|----------------|----------------|---------------|---------------|-----------|
| As_D1 | 73<br>6.0e-22 | -39<br>1.5e-2  | 13<br>6.2e-7   | 22<br>1.3e-10  | -4<br>2.0e-8   | -41<br>5.5e-4 | 10<br>1.4e-7  | ec1/hs1   |
| As_D2 | -9<br>2.1e-5  | 100<br>5.3e-30 | -10<br>5.5e-5  | -12<br>4.9e-7  | -17<br>4.5e-7  | -41<br>5.3e-4 | 28<br>1.9e-9  | ec2/hs2   |
| As_D3 | -2<br>4.9e-6  | -31<br>2.5e-3  | 142<br>1.4e-42 | 99<br>1.1e-29  | 121<br>2.6e-36 | 97<br>9.5e-29 | 33<br>5.6e-10 | S1-like   |
| As_D4 | -24<br>7.9e-4 | -21<br>8.3e-3  | 63<br>1.1e-18  | 107<br>5.0e-32 | 104<br>3.4e-31 | 82<br>1.5e-24 | 79<br>1.2e-23 | PNPase    |
| As_D5 | -75<br>8      | -83<br>8       | -96<br>8       | -96<br>8       | -106<br>8      | -103<br>8     | -79<br>8      |           |

## Fusobacteria

### *Fusobacterium nucleatum* (YP\_002165428)

|       | Dom1          | Dom2          | Dom3          | Dom4           | Dom45          | Dom5          | Dom6          | reference |
|-------|---------------|---------------|---------------|----------------|----------------|---------------|---------------|-----------|
| Fn_D1 | -23<br>6.4e-4 | -23<br>4.3e-4 | 53<br>1.3e-15 | 50<br>7.5e-15  | 66<br>1.1e-19  | 56<br>9.6e-17 | 30<br>1.4e-9  | S1-like   |
| Fn_D2 | -38<br>2.0e-2 | -44<br>4.2e-3 | 76<br>1.4e-22 | 119<br>9.7e-36 | 122<br>1.9e-36 | 84<br>3.4e-25 | 55<br>2.2e-16 | S1-like   |
| Fn_D3 | -32<br>5.2e-3 | -20<br>2.0e-4 | 26<br>4.8e-8  | 55<br>2.3e-16  | 60<br>9e-18    | 47<br>5.9e-14 | 61<br>2.9e-18 | S1-like   |
| Fn_D4 | -47<br>1.6e-1 | -19<br>1.8e-4 | 28<br>3.8e-8  | 39<br>2.7e-12  | 48<br>3.7e-14  | 46<br>1.1e-13 | 56<br>1.5e-16 | S1-like   |

## Gram positive bacteria with low G+C

### *Clostridium perfringens* (NP\_563066)

|       | Dom1          | Dom2          | Dom3          | Dom4          | Dom45         | Dom5          | Dom6          | reference |
|-------|---------------|---------------|---------------|---------------|---------------|---------------|---------------|-----------|
| Cp_D1 | 22<br>1.4e-8  | -53<br>3.0e-1 | -19<br>3.4e-4 | -35<br>1.2e-4 | -25<br>2.4e-6 | -39<br>3.7e-4 | -10<br>1.5e-5 | ec1/hs1   |
| Cp_D2 | -31<br>4.2e-3 | 59<br>1.4e-17 | -28<br>1.9e-3 | -53<br>7.4e-3 | -64<br>2.3e-2 | -68<br>2.6e-1 | -5<br>4.5e-6  | ec2/hs2   |
| Cp_D3 | -19<br>2.2e-4 | -32<br>3.3e-3 | 97<br>3.8e-29 | 86<br>1.2e-25 | 93<br>6.0e-28 | 75<br>1.9e-22 | 18<br>1.9e-8  | S1-like   |
| Cp_D4 | -19<br>2.2e-4 | -43<br>3.3e-2 | 55<br>2.0e-16 | 89<br>1.3e-26 | 84<br>3.7e-25 | 60<br>5.5e-18 | 41<br>2.1e-12 | PNPase    |

### *Lactobacillus reuteri* (YP\_001841729)

|       | Dom1          | Dom2          | Dom3           | Dom4           | Dom45          | Dom5          | Dom6          | reference |
|-------|---------------|---------------|----------------|----------------|----------------|---------------|---------------|-----------|
| Lr_D1 | 13<br>1.2e-7  | -45<br>5.3e-2 | 0<br>8.6e-6    | -17<br>1.5e-6  | -10<br>8.6e-8  | -19<br>3.6e-6 | 17<br>2.9e-8  | ec1/hs1   |
| Lr_D2 | -19<br>2.3e-4 | 46<br>8.5e-14 | -38<br>1.6e-2  | -18<br>1.8e-6  | -21<br>1.0e-6  | -37<br>2.3e-4 | 18<br>2.4e-8  | ec2/hs2   |
| Lr_D3 | -20<br>3.7e-4 | -37<br>9.8e-3 | 118<br>2.2e-35 | 101<br>3.2e-30 | 113<br>4.3e-34 | 85<br>2.1e-25 | 36<br>1.1e-10 | ec3       |
| Lr_D4 | -26<br>1.4e-3 | -20<br>2.1e-4 | 67<br>6.9e-20  | 90<br>8.1e-27  | 88<br>3.4e-26  | 63<br>8.3e-19 | 63<br>1.0e-18 | hs4       |

### *Bacillus subtilis* (AAC83962)

|       | Dom1          | Dom2          | Dom3           | Dom4           | Dom45          | Dom5          | Dom6          | reference |
|-------|---------------|---------------|----------------|----------------|----------------|---------------|---------------|-----------|
| Bs_D1 | -14<br>8.0e-5 | -49<br>1.3e-1 | -9<br>4.6e-5   | -15<br>8.8e-6  | -30<br>9.0e-6  | -45<br>1.4e-3 | 7<br>2.6e-7   | S1-like   |
| Bs_D2 | -32<br>4.8e-3 | 74<br>4.9e-22 | -26<br>1.5e-3  | -40<br>3.5e-4  | -31<br>1.2e-5  | -27<br>2.3e-5 | 27<br>2.3e-9  | ec2/hs2   |
| Bs_D3 | -17<br>1.4e-4 | -19<br>1.7e-4 | 133<br>6.1e-40 | 95<br>1.8e-28  | 112<br>1.9e-33 | 92<br>2.2e-27 | 51<br>3.6e-15 | S1-like   |
| Bs_D4 | -18<br>1.8e-4 | 3<br>1.4e-6   | 97<br>5.1e-29  | 105<br>1.5e-31 | 97<br>4.7e-29  | 70<br>5.7e-21 | 66<br>9.7e-20 | hs4       |

*Lactococcus lactis* (NP\_266994)

|       | Dom1          | Dom2          | Dom3           | Dom4           | Dom45          | Dom5           | Dom6           | reference |
|-------|---------------|---------------|----------------|----------------|----------------|----------------|----------------|-----------|
| LI_D1 | -21<br>4.2e-4 | -55<br>4.5e-1 | -39<br>1.8e-2  | -53<br>8.3e-3  | -49<br>4.2e-3  | -11<br>3.5e-3  | -7<br>1.8e-5   | ec1/hs1   |
| LI_D2 | -43<br>7.5e-2 | 84<br>3.9e-25 | -31<br>4.0e-3  | -8<br>1.6e-7   | -12<br>1.4e-7  | -37<br>2.2e-4  | 21<br>1.1e-8   | ec2/hs2   |
| LI_D3 | 4<br>1.2e-6   | -25<br>6.8e-4 | 125<br>1.5e-37 | 115<br>1.3e-34 | 110<br>4.8e-33 | 73<br>1.1e-21  | 41<br>4.6e-12  | ec3       |
| LI_D4 | -6<br>1.2e-5  | 6<br>8.3e-7   | 108<br>1.9e-32 | 140<br>4.9e-42 | 146<br>6.6e-44 | 127<br>3.5e-38 | 104<br>4.9e-31 | S1-like   |

*Acholeplasma laidlawii* (YP\_001620864)

|       | Dom1          | Dom2          | Dom3          | Dom4          | Dom45         | Dom5          | Dom6          | reference |
|-------|---------------|---------------|---------------|---------------|---------------|---------------|---------------|-----------|
| AI_D1 | -13<br>6.0e-5 | -39<br>1.3e-2 | -39<br>1.7e-2 | -45<br>1.3e-3 | -50<br>1.0e-3 | -47<br>2.2e-3 | -6<br>6.5e-6  | ec1/hs1   |
| AI_D2 | -49<br>3.4e-1 | 10<br>3.4e-7  | -38<br>1.5e-2 | -39<br>3.0e-4 | -48<br>5.1e-4 | -58<br>2.6e-2 | -19<br>1.4e-4 | ec2/hs2   |
| AI_D3 | -49<br>3.0e-1 | -38<br>1.1e-2 | 34<br>5.6e-10 | -5<br>9.0e-8  | -7<br>3.7e-8  | -4<br>1.2e-7  | 0<br>1.5e-6   | S1-like   |
| AI_D4 | -27<br>1.6e-3 | -15<br>7.7e-5 | 42<br>1.5e-12 | 65<br>2.2e-19 | 84<br>3.5e-25 | 74<br>5.3e-22 | 45<br>2.1e-13 | S1-like   |
| AI_D5 | -29<br>2.5e-3 | -27<br>9.6e-4 | -1<br>1.0e-5  | -32<br>6.2e-5 | -24<br>2.1e-6 | -28<br>3.1e-5 | 22<br>8.5e-9  | S1-like   |

*Spiroplasma kunkelii* (AAP58873)

|       | Dom1          | Dom2          | Dom3          | Dom4          | Dom45         | Dom5          | Dom6          | reference |
|-------|---------------|---------------|---------------|---------------|---------------|---------------|---------------|-----------|
| Sk_D1 | -41<br>4.7e-2 | -49<br>1.4e-1 | 35<br>3.1e-10 | 58<br>2.2e-17 | 51<br>3.2e-15 | 29<br>5.9e-18 | 31<br>9.5e-10 | S1-like   |

*Mycoplasma pulmonis* (NP\_325961)

|       | Dom1          | Dom2       | Dom3         | Dom4          | Dom45         | Dom5          | Dom6          | reference |
|-------|---------------|------------|--------------|---------------|---------------|---------------|---------------|-----------|
| Mp_D1 | -45<br>1.1e-1 | -64<br>2.6 | -4<br>1.7e-5 | -33<br>6.4e-4 | -33<br>1.7e-5 | -30<br>4.2e-5 | -33<br>3.8e-3 | S1-like   |

**Cyanobacteria***Synechococcus* (O33698)

|       | Dom1          | Dom2          | Dom3          | Dom4          | Dom45         | Dom5          | Dom6          | reference |
|-------|---------------|---------------|---------------|---------------|---------------|---------------|---------------|-----------|
| Dr_D1 | -22<br>4.9e-4 | -32<br>2.8e-3 | -19<br>3.2e-4 | -59<br>3.5e-2 | -64<br>2.3e-2 | -64<br>9.7e-2 | -12<br>2.5e-5 | ec1/hs1   |
| Dr_D2 | -51<br>4.2e-1 | 6<br>7.9e-7   | -46<br>6.5e-2 | -54<br>9.7e-3 | -51<br>1.2e-3 | -54<br>1.1e-2 | -16<br>6.3e-5 | ec2/hs2   |
| Dr_D3 | -23<br>6.8e-4 | -15<br>7.3e-5 | 55<br>2.4e-16 | 35<br>6.8e-12 | 37<br>1.5e-12 | 32<br>3.3e-11 | 12<br>9.2e-8  | S1-like   |

## Deinococcus-thermus and Chlorolexi

### *Deinococcus radiodurans* (NP\_295706)

|       | Dom1          | Dom2          | Dom3           | Dom4           | Dom45          | Dom5           | Dom6          | reference |
|-------|---------------|---------------|----------------|----------------|----------------|----------------|---------------|-----------|
| Dr_D1 | 47<br>5.4e-14 | -22<br>4.0e-4 | -8<br>4.8e-5   | -7<br>1.3e-7   | -12<br>1.3e-7  | -13<br>8.5e-7  | 11<br>1.0e-7  | ec1/hs1   |
| Dr_D2 | -46<br>1.5e-1 | 90<br>9.4e-27 | -38<br>9.5e-3  | -52<br>6.3e-3  | -51<br>1.2e-3  | -69<br>3.3e-1  | 17<br>3.0e-8  | ec2/hs2   |
| Dr_D3 | §<br>7.4e-7   | -40<br>1.8e-2 | 132<br>1.5e-39 | 77<br>7.7e-23  | 94<br>3.2e-28  | 73<br>7.3e-22  | 58<br>2.8e-17 | S1-like   |
| Dr_D4 | -7<br>1.5e-5  | -31<br>2.4e-3 | 107<br>4.6e-32 | 185<br>1.9e-55 | 189<br>1.9e-56 | 161<br>3.2e-48 | 82<br>1.9e-24 | ec5/hs5   |
| Dr_D5 | -19<br>2.7e-4 | -24<br>5.6e-4 | 52<br>1.5e-15  | 112<br>1.2e-33 | 105<br>1.8e-31 | 86<br>1.5e-25  | 84<br>4.8e-25 | S1-like   |

### *Thermus thermophilus* (CAD30282)

|       | Dom1          | Dom2          | Dom3           | Dom4           | Dom45          | Dom5           | Dom6          | reference |
|-------|---------------|---------------|----------------|----------------|----------------|----------------|---------------|-----------|
| Tt_D1 | 41<br>3.1e-12 | -10<br>2.8e-5 | 14<br>5.2e-7   | 12<br>1.6e-9   | -9<br>7.1e-8   | -31<br>5.8e-5  | 20<br>1.3e-8  | ec1/hs1   |
| Tt_D2 | -29<br>2.6e-3 | 99<br>8.8e-30 | 5<br>2.9e-6    | -3<br>4.8e-8   | -1<br>1.0e-8   | -22<br>7.5e-6  | 51<br>3.1e-15 | ec2/hs2   |
| Tt_D3 | 2<br>1.8e-6   | -39<br>1.4e-2 | 129<br>1.7e-38 | 94<br>3.6e-28  | 114<br>5.1e-34 | 95<br>2.5e-28  | 66<br>1.1e-19 | S1-like   |
| Tt_D4 | -5<br>8.9e-6  | -26<br>8.4e-4 | 102<br>2.1e-30 | 190<br>5.6e-57 | 193<br>4.9e-58 | 162<br>1.4e-48 | 81<br>3.0e-24 | S1-like   |
| Tt_D5 | -13<br>6.2e-5 | -8<br>1.8e-5  | 89<br>1.1e-26  | 139<br>1.5e-41 | 145<br>1.6e-43 | 124<br>5.1e-37 | 93<br>8.1e-28 | hs4       |

### *Chloroflexus* sp. (YP\_002570790)

|       | Dom1          | Dom2          | Dom3           | Dom4           | Dom45          | Dom5          | Dom6          | reference |
|-------|---------------|---------------|----------------|----------------|----------------|---------------|---------------|-----------|
| Ch_D1 | 7<br>5.6e-7   | -59<br>1.1    | -27<br>1.7e-3  | -48<br>2.5e-3  | -57<br>4.8e-3  | -55<br>1.3e-2 | -26<br>6.4e-4 | ec1/hs1   |
| Ch_D2 | -53<br>7.4e-1 | 15<br>1.2e-7  | -41<br>2.7e-2  | -56<br>1.5e-2  | -63<br>2.1e-2  | -65<br>1.5e-1 | -2<br>2.4e-6  | ec2/hs2   |
| Ch_D3 | -18<br>2.0e-4 | -42<br>2.7e-2 | 121<br>3.2e-36 | 105<br>2.1e-31 | 107<br>3.8e-32 | 89<br>1.4e-26 | 39<br>2.0e-11 | ec3       |
| Ch_D4 | -33<br>6.5e-3 | -32<br>3.0e-3 | 34<br>6.3e-10  | 72<br>1.4e-21  | 62<br>2.1e-12  | 42<br>2.1e-12 | 71<br>2.6e-21 | S1-like   |

## Thermotogae

*Thermotoga maritima* (NP\_229244)

|       | Dom1          | Dom2          | Dom3          | Dom4           | Dom45          | Dom5           | Dom6          | reference |
|-------|---------------|---------------|---------------|----------------|----------------|----------------|---------------|-----------|
| Tm_D1 | 25<br>7.4e-9  | -14<br>6.2e-5 | -25<br>1.4e-3 | -22<br>5.9e-6  | -18<br>5.7e-7  | -32<br>6.8e-5  | 3<br>7.1e-7   | ec1/hs1   |
| Tm_D2 | -56<br>1.3    | 37<br>7.2e-11 | -25<br>1.1e-3 | -40<br>3.9e-4  | -50<br>9.1e-4  | -66<br>1.6e-1  | -33<br>3.1e-3 | Ec2/hs2   |
| Tm_D3 | -27<br>1.5e-3 | 3<br>1.4e-6   | 50<br>1.0e-14 | 52<br>1.9e-15  | 56<br>9.5e-17  | 43<br>7.3e-13  | 59<br>1.9e-17 | S1-like   |
| Tm_D4 | -11<br>3.7e-5 | 2<br>1.6e-6   | 48<br>3.1e-14 | 106<br>8.8e-32 | 108<br>2.0e-32 | 88<br>3.2e-26  | 88<br>3.2e-26 | S1-like   |
| Tm_D5 | -5<br>8.6e-6  | 26<br>1.0e-8  | 74<br>4.9e-22 | 139<br>1.6e-41 | 144<br>3.8e-43 | 118<br>2.9e-35 | 89<br>1.2e-26 | S1-like   |
| Tm_D6 | -10<br>2.7e-5 | 0<br>3.0e-6   | -10<br>5.5e-5 | 24<br>9.1e-11  | 17<br>1.5e-10  | -26<br>2.0e-5  | 28<br>1.9e-9  | NF        |
